# Supplementary material
Source: PubMed Central journal article supplement (PMC3004359)

## Suppl. Figure 1

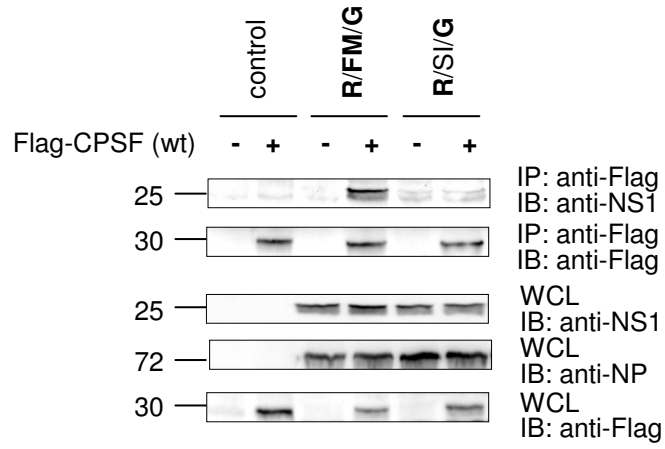

## Suppl. Figure 2

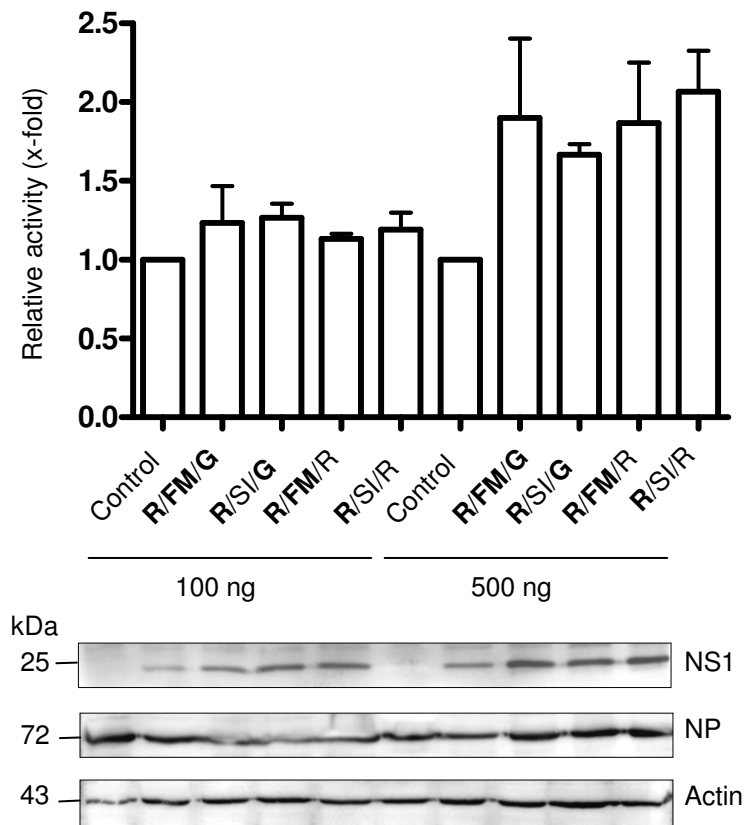

Supplement: supp_84_24_12761__1.pdf [file supp_84_24_12761__1.pdf]
